# Supplementary material
Source: PubMed Central journal article supplement (PMC3291864)

**Supplemental Methods.**

**Caspase-3/7 activity assay.** To determine the induction of apoptosis in C57BL/6 WT and PAFR(-/-) mice following DMBA treatment, the dorsal skin of these mice were shaved and then treated with 100 µg of DMBA. After 24 hours of DMBA treatment, mice were sacrificed and a segment of mouse skin was stored in liquid nitrogen. Whole dorsal skin was scraped using a curette and homogenized in hypotonic extraction buffer containing 25mM HEPES, 5mM MgCl<sub>2</sub>, 1mM EGTA, 1mM pefabloc, 1µg/ml protease inhibitors leupeptin, aprotinin and pepstatin. The samples were centrifuged and supernatants were collected. After measuring protein content, 0.5mg of total protein in 100µl was added to each well of a 96 well ELISA plate followed by adding 100µl of caspase-3/7 glo reagent (Promega, Madison WI) and incubated for 1 hour in dark prior to measurement using a SpectraMax L Luminescence microplate reader (Molecular Devices, Sunnyvale CA).

**Immunohistochemistry staining for Ki-67 and H&E.** For immunohistochemistry, formalin-fixed paraffin-embedded sections of mouse epidermis were deparaffinized and rehydrated. Antigen retrieval was performed using 10mM citrate buffer, pH 6.0. Immunolabeling was done using monoclonal rabbit anti-Ki-67 (Clone SP6, Thermo Fisher Scientific, Fremont, CA) followed by detection using the EnVision(+) DAB visualization kit (Dako Cytomation, Inc. Fort Collins, CO). The slides were then counter-stained with hematoxylin. Ten random fields were counted in all slides, at either 200 or 400x total magnification, in a blinded manner for each condition using a Nikon Eclipse E400 microscope (Nikon Corp. Melville, NY).

**SUPPLEMENTAL FIGURE LEGENDS**

**Supplemental Figure 1: Loss of the PAFR has no effect on papilloma proliferation or on chronic PMA induced hyperplasia. (A)** Similarly sized papillomas were selected from WT and PAFR (-/-) mice treated with DMBA followed by 25 weeks of PMA treatment as described in figure 6. Five random fields were selected to count total and Ki-67 positive cells over a 200 µm linear section of the tumor as measured along the basement membrane. Data is represented as the mean Ki-67 positive cells ± SD from 6-10 different mice per group. **(B)** The dorsal epidermis of WT or PAFR (-/-) mice were treated with vehicle or 40 nmole of PMA twice weekly on non-consecutive days for 17 days. On day 18, the mice

were sacrificed and treated dorsal epidermis excised and fixed in 10% buffered formalin. Following immunolabeling, Ki-67 positive cells and total hematoxylin labeled cells were counted from five randomly selected fields for each vehicle and PMA treated WT and PAFR(-/-) mouse (6-10 mice per group) and presented as a percentage of total cells per 125  $\mu\text{m}$  of epidermis (measured along the basement membrane).

**Supplemental Figure 2: DMBA-treated PAFR(-/-) exhibit no difference in apoptosis from their control littermates.** The dorsal back skin of WT or PAFR(-/-) mice were shaved and 100  $\mu\text{g}$  of DMBA was applied in 0.2 ml acetone topically. **(A)** After 24 hours, mice were sacrificed and treated dorsal epidermis was excised and analyze for caspase 3/7 activity from protein lysates (0.5mg) extracted from the scrapped epidermis using a fluorogenic assay kit. Data are the mean  $\pm$  SD of 4 WT and PPAR $\gamma$ (epi(-/-)) mice. **(B)** Similarly, WT and PAFR(-/-) mice were treated with 100  $\mu\text{g}$  of DMBA and after 48 hours, mice were sacrificed and treated dorsal epidermis was bisected at the midline overlying the spinal column and fixed in 10% buffered formalin and caspase-3 stained slides were produced to quantitate caspase-3 positive cells in the epidermis from five randomly selected areas under 200x field. Data are the mean  $\pm$  SD of 3-6 WT and PPAR $\gamma$ (epi(-/-)) mice.

### A. Tumors

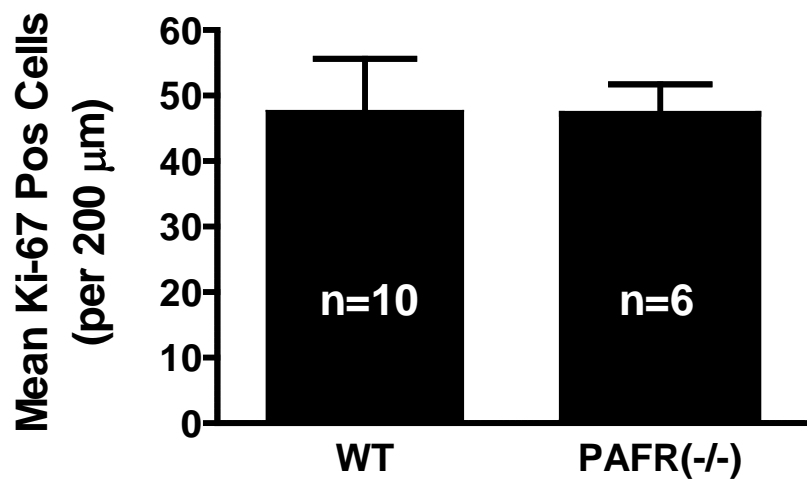

### B. PMA-induced hyperplasia

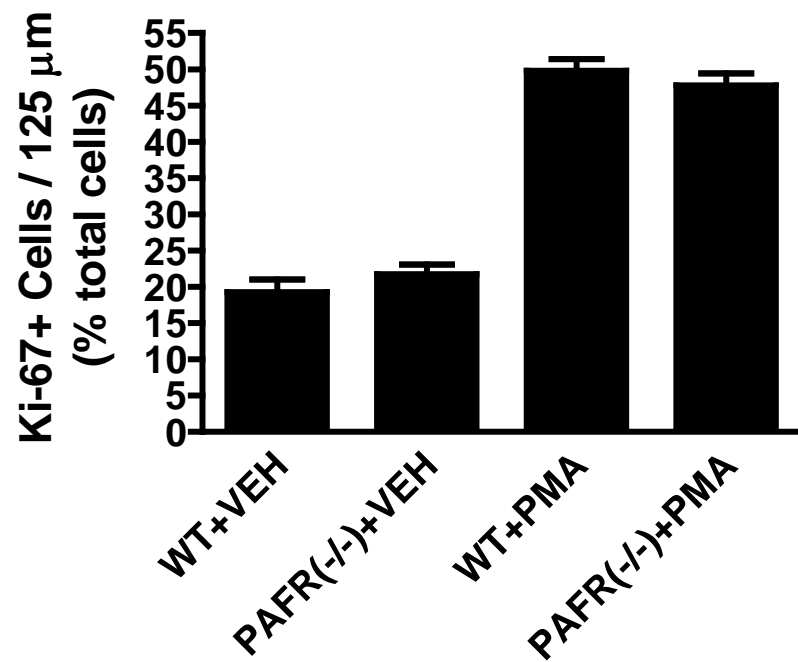

### A. 24 hrs

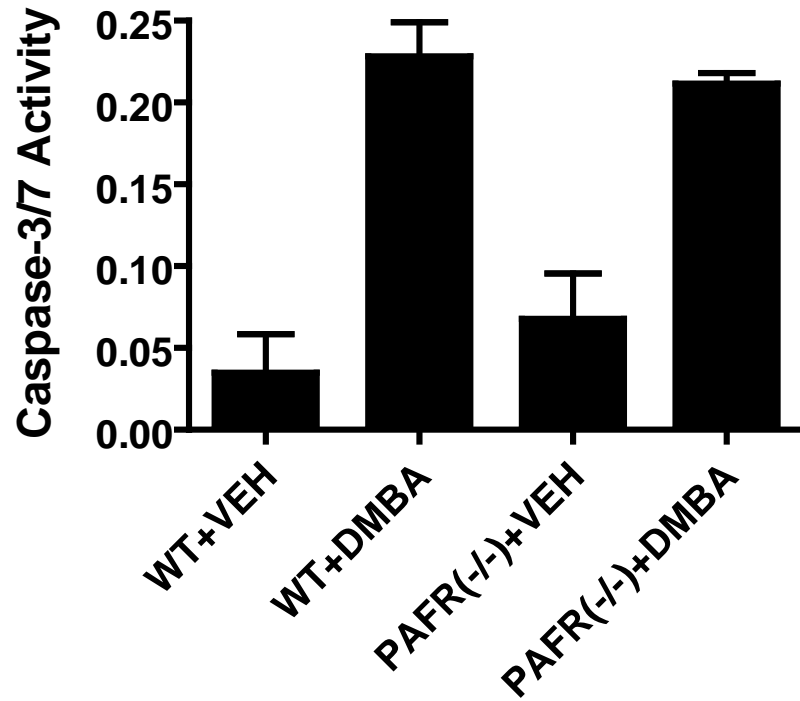

### B. 48 hrs

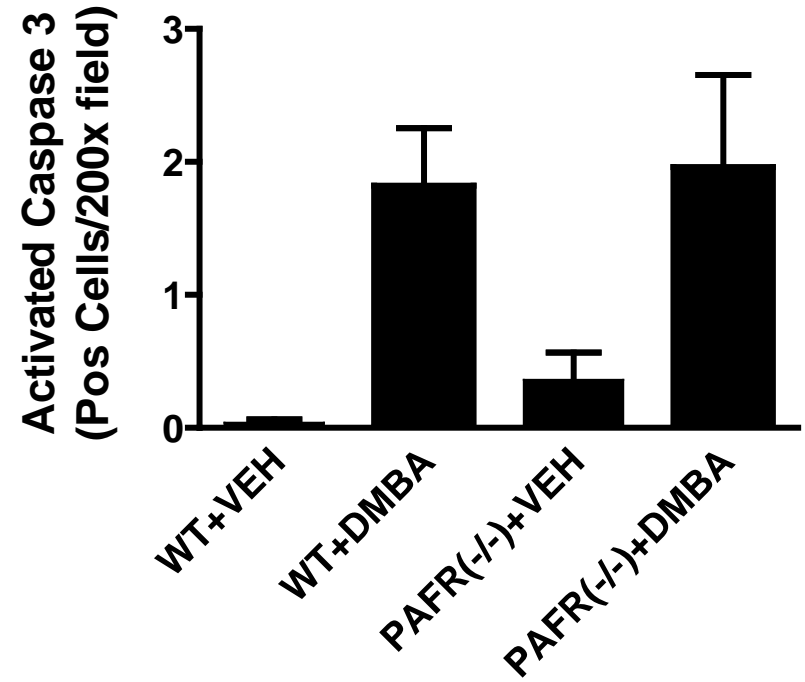

Supplement: supp_bgr322_BGR322_Supplemental_material_revised.pdf [file supp_bgr322_BGR322_Supplemental_material_revised.pdf]
